# Supplementary material
Source: PubMed Central journal article supplement (PMC6319927)
Supplement: NIHMS443422-supplement-Supplementary_information.pdf [file NIHMS443422-supplement-Supplementary_information.pdf]

**Thpok-independent repression of *Runx3* by *Gata3* during CD4<sup>+</sup> T-cell differentiation in the thymus.**

Yumei Xiong, Ehydel Castro, Ryoji Yagi, Jinfang Zhu, Renaud Lesourne, Paul E. Love, Lionel Feigenbaum and Rémy Bosselut.

**Supporting Information**

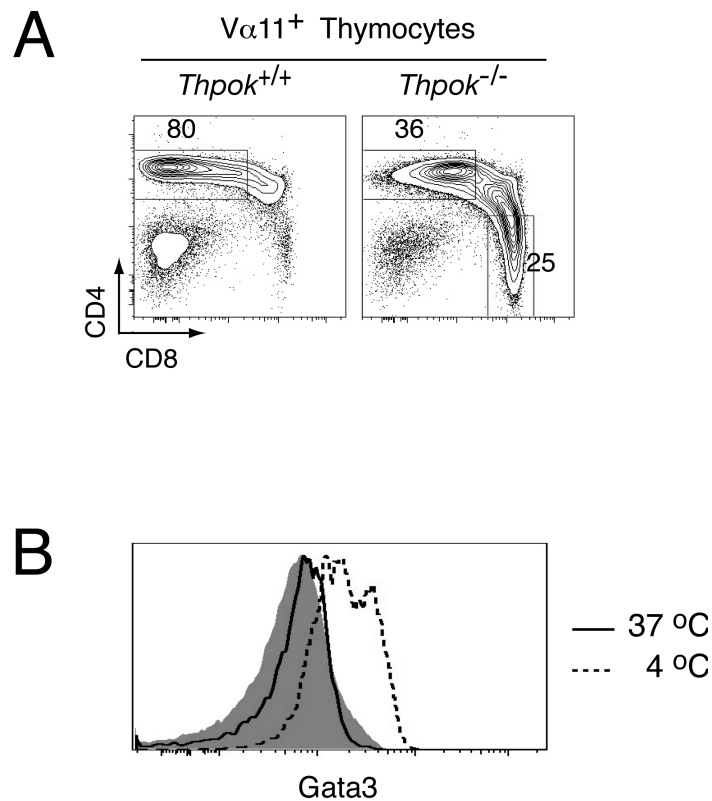

**Figure 1. Characterization of *Runx3*-expressing thymocyte subsets.** (A) Contour plots of CD4 vs. CD8 expression in V $\alpha$ 11<sup>+</sup> thymocytes from *Thpok*<sup>+/+</sup> and *Thpok*<sup>-/-</sup> AND TCR transgenic mice. (B) Expression of intra-cellular *Gata3* in wild-type CD4 SP thymocytes after overnight single-cell suspension culture (37 °C, solid line histogram) or kept at 4 °C as a control (dashed line histogram). *Gata3* expression in DP thymocytes is shown as a reference (gray-shaded histogram).

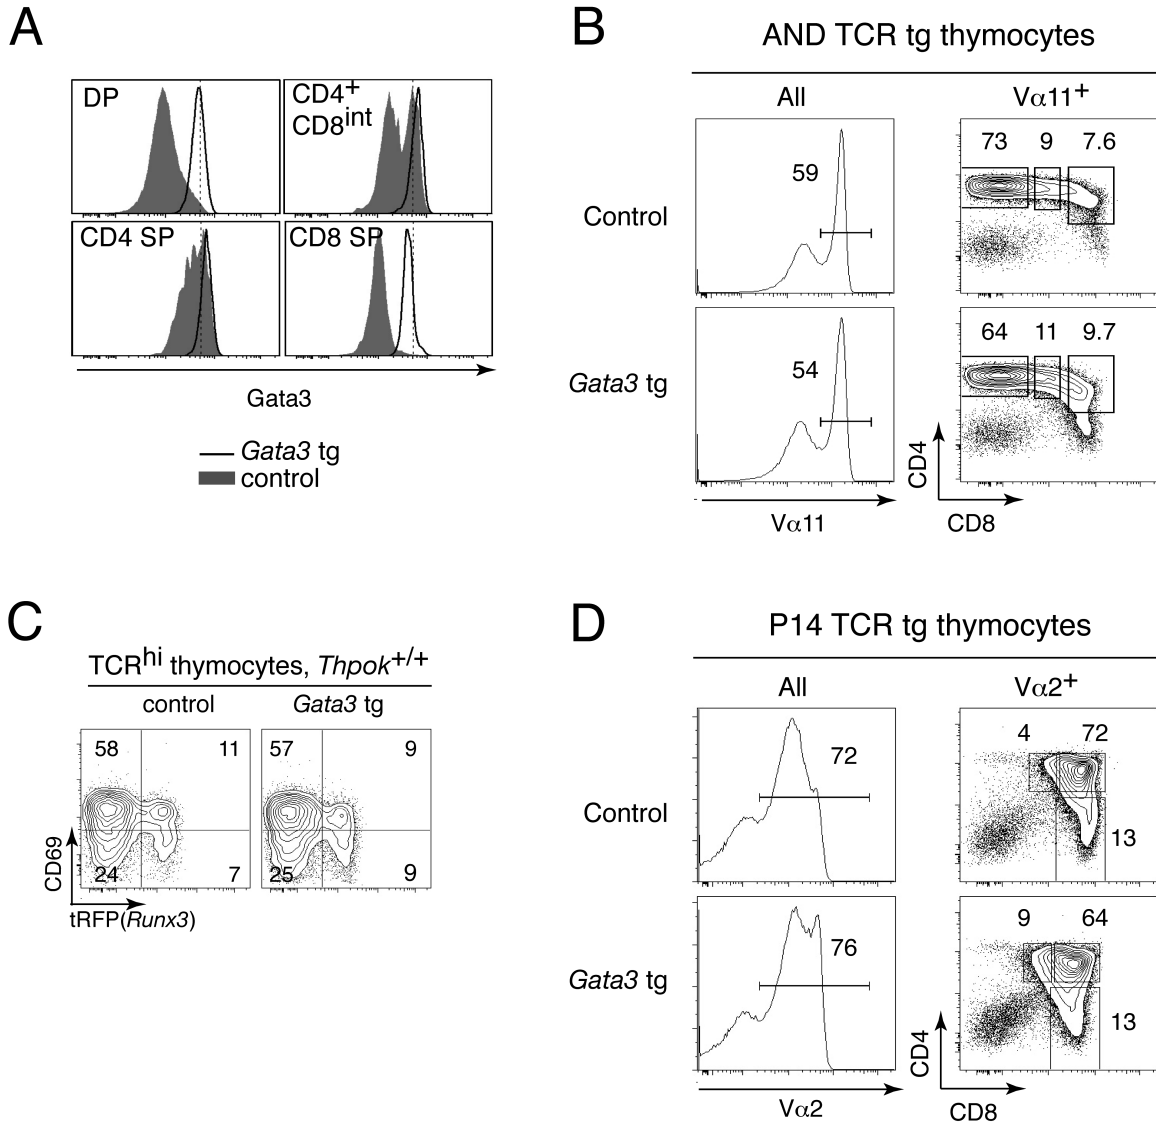

**Figure 2. Development of *Gata3*-transgenic thymocytes.** (A) Expression of intracellular *Gata3* in *Thpok*<sup>-/-</sup> *Gata3* transgenic thymocyte subsets (solid line) or their non-transgenic counterparts (gray-shaded histograms) is displayed as in Fig. 2A. (B, D) Single-color histograms (left) show expression of the transgenic TCR $\alpha$  chains in thymocytes from *Gata3*-transgenic or control mice carrying either the MHC II-restricted AND (A) or MHC I-restricted P14 (C) TCR transgene ( $V\alpha 11$  and  $V\alpha 2$  respectively). Contour plots (right) show expression of CD4 and CD8 on  $V\alpha 11^{\text{hi}}$  (A) and  $V\alpha 2^{\text{hi}}$  (C) thymocytes, gated as indicated on the left. (C) Plots depict expression of *Runx3*<sup>tRFP</sup> vs. CD69 in post-selection (TCR<sup>hi</sup>) thymocytes from *Gata3* transgenic and control *Thpok*<sup>+/+</sup> mice. Note that only MHC I-restricted cells express *Runx3* in *Thpok*<sup>+/+</sup> mice, so that these experiments explore *Gata3*-mediated repression of *Runx3* in MHC I-restricted cells.

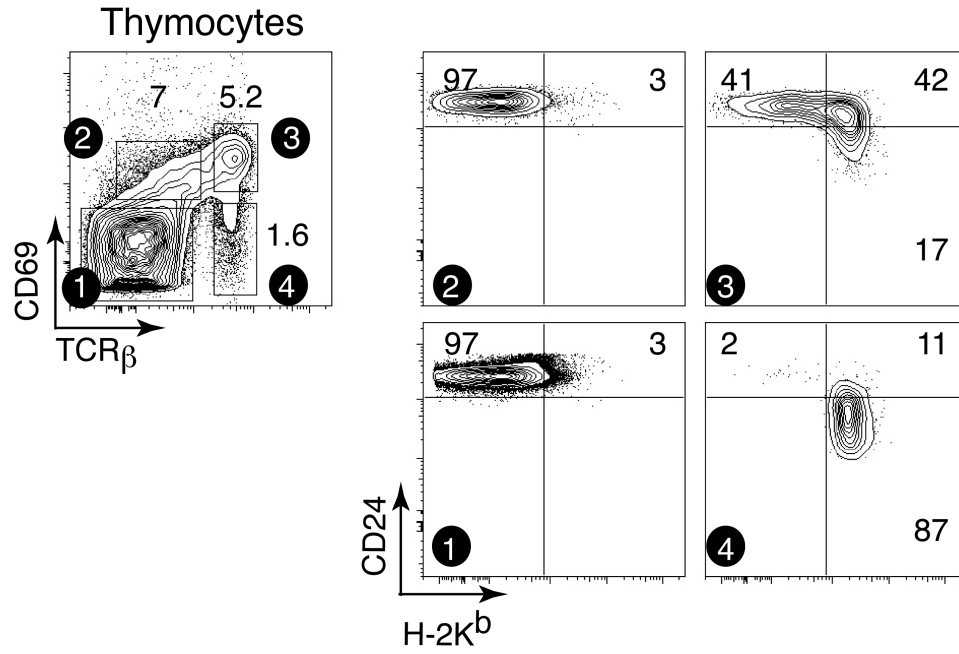

**Figure 3. Comparison of CD69, CD24 and H-2K<sup>b</sup> expression during positive selection.** H-2K<sup>b</sup> and CD24 expression (right plots) are displayed in thymocytes subsets defined by TCR and CD69 expression (left plot). White numbers on a black background indicate the normal developmental progression.
